# Supplementary material for: Non-metal doped Fe–C2N as an electrocatalyst for oxygen reduction reaction: a density functional calculation
Source: Royal Society of Chemistry journal article supplement (doi:10.1039/d3nj03279e), 2023-01-01
Supplement: d3nj03279e1.pdf [file d3nj03279e1.pdf]

## **Effects of non-metals doping on oxygen reduction reaction of Fe-C<sub>2</sub>N electrodes**

Dan Shu,<sup>a</sup> Dan Wang,<sup>\*b</sup> and Yan Wang<sup>\*c</sup>

<sup>a</sup> *School of Physics and Electronic Science, Hunan University of Science and Technology, Xiangtan 411201, China.*

<sup>b</sup> *College of Science, Central South University of Forestry and Technology, Changsha 410004, China. E-mail: [wangdan@hnu.edu.cn](mailto:wangdan@hnu.edu.cn)*

<sup>c</sup> *School of Information and Electrical Engineering, Hunan University of Science and Technology, Xiangtan 411201, China. E-mail: [ywang8@hnust.edu.cn](mailto:ywang8@hnust.edu.cn)*

In electrochemistry, the basic reaction steps of four electrons under acidic conditions can be expressed as follows:

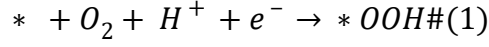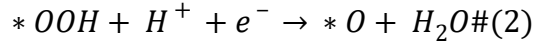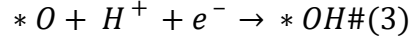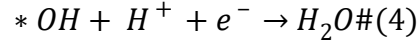

Where \* represents the active site of O containing intermediates (\* O, \* OH and \* OOH) on the material surface. The Gibbs free energy of O-containing intermediates involved in ORR is calculated as follows:

$$\Delta G_{*O_xH_y} = G_{*O_xH_y-M} - G_M - [xG_{H_2O} - (2x-y)G_{H_2}/2] \#(5)$$

Where  $G_{*O_xH_y-M}$ ,  $G_M$ ,  $G_{H_2O}$  and  $G_{H_2}$  represent the total Gibbs free energy, the Gibbs free energy of the substrate, the Gibbs free energy of H<sub>2</sub>O and the Gibbs free energy of H<sub>2</sub>. The change in Gibbs free energy of the ORR step can be calculated as:

$$\Delta G_1 = \Delta G_{*OOH} - 4.92 \#(6)$$

$$\Delta G_2 = \Delta G_{*O} - \Delta G_{*OOH} \#(7)$$

$$\Delta G_3 = \Delta G_{*OH} - \Delta G_{*O} \#(8)$$

$$\Delta G_4 = -\Delta G_{*OH} \#(9)$$

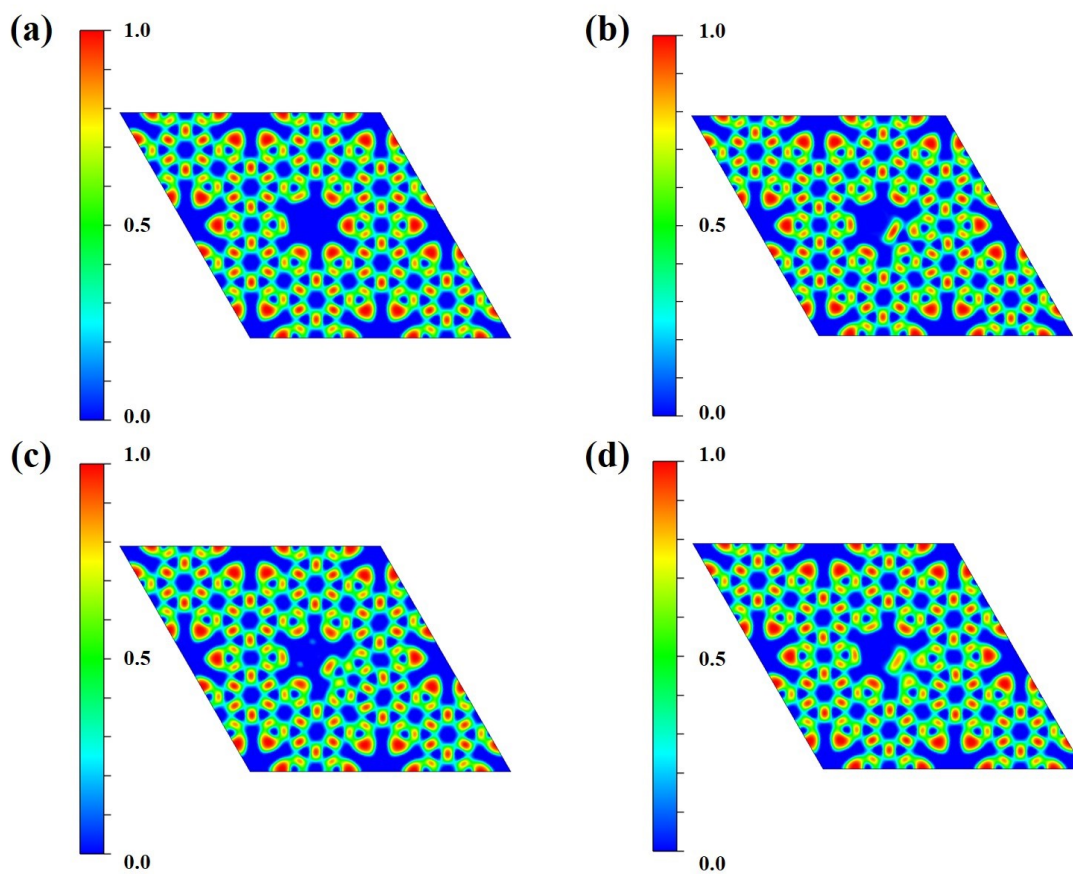

Figure S1. The ELF plot of Fe-C<sub>2</sub>N (a); FeB-C<sub>2</sub>N (b); FeN-C<sub>2</sub>N (c) and FeP-C<sub>2</sub>N (d).

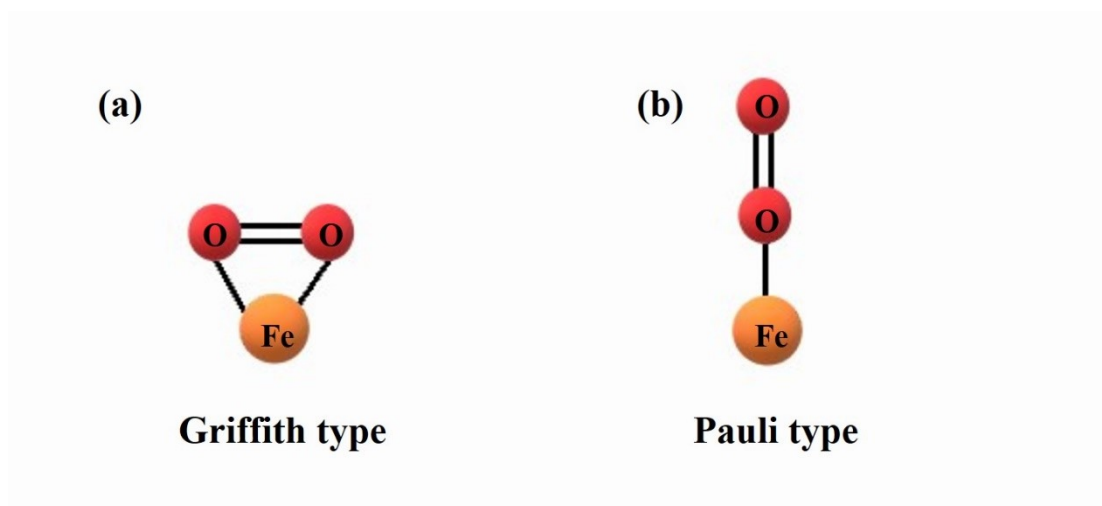

Figure S2. Griffith and Pauli adsorption configurations of O<sub>2</sub>.

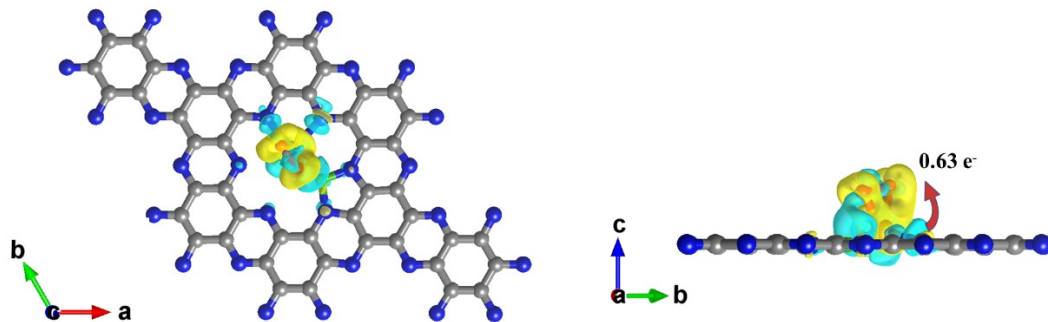

Figure S3. Charge density difference for  $O_2$  adsorption states and corresponding Bader charge transfer number on FeB- $C_2N$ . Color code: yellow stands for electron accumulation and cyan stands for electron depletion.

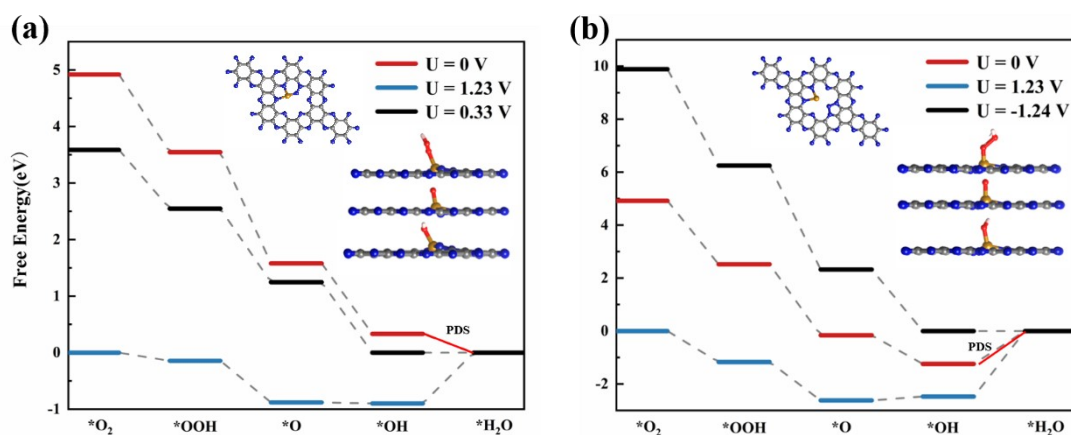

Figure S4. The free energy diagram of the ORR of the adjacent (a) and symmetric (b) sites of Fe- $C_2N$  under different potentials in vacuum. Red solid line represents the PDS.

Table S1. Overpotential of materials with different doping.

|                  | Fe- $C_2N$ | FeB- $C_2N$ | FeC- $C_2N$ | FeN- $C_2N$ | FeP- $C_2N$ |
|------------------|------------|-------------|-------------|-------------|-------------|
| $\eta_{ORR}$ (V) | 1.38       | 3.05        | 0.87        | 2.47        | 1.24        |

Table S2. The adsorption energy of different materials for \* OH.

|                | Fe- $C_2N$ | FeB- $C_2N$ | FeC- $C_2N$ | FeN- $C_2N$ | FeP- $C_2N$ |
|----------------|------------|-------------|-------------|-------------|-------------|
| $E_{ads}$ (eV) | -11.26     | -10.77      | -10.74      | -12.33      | -11.09      |
